# Supplementary material for: Membranes, energetics, and evolution across the prokaryote-eukaryote divide
Source: eLife. 2017 Mar 16;6:e20437. doi: 10.7554/eLife.20437 (PMC5354521; doi:10.7554/eLife.20437)
Supplement: Figure 2—source data 1. [file elife-20437-fig2-data1.xlsx]

## Sheet: Figure 2-source data
Source datafor Figure 2 for Lynch and Marinov. Cell volumes (column C) and estimated numbers of ribosomes per cell (column F), mostly obtained as direct estimates taken from microscopic examinations, and in a few cases from proteomic estimates by averaging of
cell-specific estimates for each ribosomal protein subunit. References are given separately for each trait, and where multiple estimates were available, the means are given for the species.
Full details (the complete reference plus the relevant figure number) are given in the sheets labelled "Cell Volumes" and "Ribosome Numbers".
		Cell			Ribosomes
		Volume			per cell
		(um^3)
Bacteria:
Bacillus subtilis		1.443		Shuter et al. (1983, Am. Nat).	6000		Barrera and Pan (2004, RNA)
				Kubitschek (1969, Biophys. J.)
				Jeong et al. (1990, Biotech. Bioeng.)
				Maass et al. (2011, Anal. Chem.)
				Sharpe et al. (1998, J. Bacteriol.)
				Weart et al. (2007, Cell)
Escherichia coli		0.934		Phillips and Milo (2009, PNAS)	27529		Bremer and Dennis (1996, in Neidhardt et al.)
				Kubitschek (1969, Biophys. J.)			Bakshi et al. (2012, Mol. Microbiol.)
				Trousselier et al. (1997, Aquatic Microbiol.)			Nilsson et al. (1997, Biotech. Bioeng.)
				Wang et al. (2008, Env. Sci. Tech.)			Arfvidsson and Wahlund (2003, Anal. Biochem.)
							Wizniewski et al. (2014, Molec. & Cell. Proteomics)
							Lu et al. (2007, Nature Biotech.)
Legionella pneumophila		0.58		Wang et al. (2008, Env. Sci. Tech.)	7400		Leskela et al. (2005, J. Microbiol. Methods)
Leptospira interrogans		0.22		Beck et al. (2009, Nature Methods)	4122		Beck et al. (2009, Nature Methods)
							Schmidt et al. (2011, Mol. Syst. Biol.)
Mycoplasma pneumoniae		0.05		Hassselbring et al. (2006, PNAS)	209		Yus et al. (2009, Science)
							Seybert et al. (2006, J. Struc. Biol.)
							Kuhner et al. (2009, Science)
							Maier et al. (2011, Mol. Syst. Biol.)
Mycobacterium tuberculosis		0.21		Yamada et al. (2015, Plos One)	1672		Yamada et al. (2015, PLOS ONE)
Rickettsia prowazekii		0.09		Pang and Winkler (1994, Mol. Microbiol.)	1500		Pang and Winkler (1994, Mol. Microbiol.)
Sphingopyxis alaskensis		0.07		Wang et al. (2008, Env. Sci. Tech. 42:6749)	1025		Fegatella et al. (1998, Appl. Environ. Microbiol.)
Spiroplasma melliferum		0.0183		Ortiz et al. (2006, J. Struct. Biol.)	275		Ortiz et al. (2006, J. Struct. Biol.)
Staphylococcus aureus		0.309333		Shuter et al. (1983, Am. Nat).	54400		Martin and Iandolo (1975, J. Bacteriol.)
				Montesinos et al. (1983, Appl. Environ. Microbiol.)
				Maass et al. (2011, Anal. Chem.)
Archaea
ARMAN		0.03		Comolli et al. (2009, ISME J.)	92		Comolli et al. (2009, ISME J.)
Unicellular eukaryotes:
Exophiala dermatitidis		43.8		Biswas et al. (2003, J. Elect. Microsc.)	195000		Biswas et al. (2003, J. Electron Microsc.)
Saccharomyces cerevisiae		67.9		Klis et al. (2014, Euk. Cell)	157310		Warner (1999. Trends Biochem.)
				Weiss et al. (1975, PNAS)			Yamaguchi et al. (2011, J. Electron Microscop.)
				Bryan et al. (2010, PNAS)			Kulak et al. (2014, Nature Methods)
				Haddad and Lindegren (1953, Appl. Microbiol.)			Ghaemmaghami et al. (2003)
Schizosaccharomyces pombe		132.8		Shuter et al. (1983, Am. Nat).	276820		Marguerat et al. (2012, Cell)
				Mitchison (1957, Exp. Cell Res.)			Maclean (1965, Nature)
				Fantes (1977, J. Cell. Sci.)			Kulak et al. (2014, Nature Methods)
				Nurse (1975, Nature)			Marguerat et al. (2012, Cell)
Tetrahymena pyriformis		14588		Hellung-Larsen and Andersen (1989, J. Cell Sci.)	88900000		Hallberg and Bruns (1976, J. Cell Biol.)
				Rogerson (1981, Hydrobiol.)
				Houba et al. (1981, Eur. J. Appl. Microbiol. Biotech.)
				Taylor and Shuter (1981, Amer. Natur.)
				Fenchel and Finlay (1983, Microb. Ecol.)
Tetrahymena thermophila		12741.5		Jauker et al. (1986, Exp. Cell Res.)	74000000		Calzone et al. (1983, J. Biol. Chem.)
				Seyfert et al. (1984, J. Cell Sci.)
Plants:
Chlamydomonas reinhardtii		139		Umen and Goodenough (2001, Genes Devel.)	120500		Bourque et al. (1971, J. Cell Biol.)
				Garz et al. (2012, Biophys. J.)
				Craigie and Cavalier-Smith (1982, J. Cell Sci.)
				Lien and Knutsen (1979, J. Phycol.)
Ostreococcus tauri		0.91		Henderson et al. (2007, PLOS ONE)	1250		Henderson et al. (2007, PLOS ONE)
Adonis aestivalis		2452.43		Lin and Gifford (1976, Can. J. Bot.)	3.69e+07		Lin and Gifford (1976, Can. J. Bot.)
Rhus toxicodendron		1222		Vassilyev (2000, Internat. J. Plant Sci.)	2400000		Vassilyev (2000, Internat. J. Plant Sci.)
Zea mays root cell		240000		Hsiao (1970, Plant Physiol.)	25500000		Hsiao (1970, Plant Physiol.)
Mammals:
Hamster, intestinal enterocyte		1890		Buschmann and Manke (1981, J. Ultrastruct. Res., part II.)	1500000		Buschmann and Manke (1981, J. Ultrastruct. Res., part II)
HeLa cell		2800		Zhao et al. (2008, NMR Biomed.)	3.89057e+06		Duncan and Hershey (1983, J. Bio. Chem.)
				Milo (2013, BioEssays)			Kulak et al. (2014, Nature Methods)
Mouse pancreas		1434		Dean (1973, Diabetologia)	1340000		Dean (1973, Diabetologia)
Rat liver cell		4940		Weibel et al. (1969, J. Cell Biol.)	12700000		Weibel et al. (1969, J. Cell Biol.)

## Sheet: Cell Volumes
Data underlying the cell volume data on the sheet "Figure 2-source data".
Bacteria:
Bacillus subtilis		1.1		Shuter et al. (1983, Am. Nat. 122:26).	Table 1
		1.41		Kubitschek (1969, Biophys. J. 9:792)	Figure 2
		0.9		Jeong et al. (1990, Biotech. Bioeng. 35:160)	Page 80
		0.867		Maass et al. (2011, Anal. Chem. 83:2677)	Mean of three values in Sup. Table 3
		1.66		Sharpe et al. (1998, J. Bacteriol. 180:547)	Table 2, gives average length and width of 3.35 and 0.83 um; use volume of rod
		2.72		Weart et al. (2007, Cell. 130:335)	Figure 1B/C in the supplemental materials gives average length of 4.67 um and width of 0.89 um; use volume of rod
	mean	1.443
Escherichia coli		1.3		Phillips and Milo (2009, PNAS 106:21465)	Based on dimensions given on page 21467 (right-hand column); used formula of a rod for volume.
		1.46		Kubitschek (1969, Biophys. J. 9:792)	Figure 2
		0.504		Trousselier et al. (1997, Aquatic Microbiol. 13:113)	Average of two volumes determined from dimensions in Table 1.
		0.47		Wang et al. (2008, Env. Sci. Tech. 42:6749)	Table 1
	mean	0.934
Legionella pneumophila		0.58		Wang et al. (2008, Env. Sci. Tech. 42:6749)	Table 1
Leptospira interrogans		0.22		Beck et al. (2009, Nature Methods, 6:817)	Supplemental Figure 6, legend
Mycoplasma pneumoniae		0.05		Hassselbring et al. (2006, PNAS: 103:16478)	Stated in Introduction to have a volume 5% of that of E. coli
Mycobacterium tuberculosis		0.21		Yamada et al. (2015, Plos One, 10:e0117109)	Abstract; this excludes the outer membrane and periplasm, which if added lead to 0.293
Rickettsia prowazekii		0.09		Pang and Winkler (1994, Mol. Microbiol. 12:115)	Footnote e, Table 2
Sphingopyxis alaskensis		0.07		Wang et al. (2008, Env. Sci. Tech. 42:6749)	Table 1
Spiroplasma melliferum		0.0183		Ortiz et al. (2006, J. Struct. Biol. 156:334)	Page 339
Staphylococcus aureus		0.382		Shuter et al. (1983, Am. Nat. 122:26).	Table 1
		0.266		Montesinos et al. (1983, Appl. Environ. Microbiol. 46:1007)	Table 1
		0.28		Maass et al. (2011, Anal. Chem. 83:2677)	Average of medians from Table S5
	mean	0.309333
Vibrio angustum				No cell volume data available.
Archaea:
ARMAN		0.03		Comolli et al. (2009, ISME J. 3:159)	Abstract
Unicellular eukaryotes:
Exophiala dermatitidis		43.8		Biswas et al. (2003, J. Elect. Microsc. 52:133)	Table 2, cell + cell wall averages
Saccharomyces cerevisiae		69		Klis et al. (2014, Euk. Cell 13:2)	Table 2, at 0.35 / hr growth (52.6 averaged over seven growth rates)
		66.9		Weiss et al. (1975, PNAS 72:794)	Table 1, haploid, unlimited growth
		62.5		Bryan et al. (2010, PNAS 107:999)	Average of adult cell volumes in Figures S2 and S4.
		73		Haddad and Lindegren (1953, Appl. Microbiol. 1:153)	Table 1
	mean	67.85
Schizosaccharomyces pombe		130		Shuter et al. (1983, Am. Nat. 122:26).	Table 2
		148.5		Mitchison (1957, Exp. Cell Res. 13:244)	Table 1.
		123.8		Fantes (1977, J. Cell. Sci. 24:51)	Dimension of rod on page 52.
		129		Nurse (1975, Nature 256:547)	Table 1.
	mean	132.825
Tetrahymena pyriformis		7500		Hellung-Larsen and Andersen (1989, J. Cell Sci. 92:319)	Discussion.
		19500		Rogerson (1981, Hydrobiol. 85:117)	Table 1
		15230		Houba et al. (1981, Eur. J. Appl. Microbiol. Biotech. 11:179)	Table 1
		17067		Taylor and Shuter (1981, Amer. Natur. 118:160)	Table 1
		13643		Fenchel and Finlay (1983, Microb. Ecol. 9:99)	Average of 9 values for growing cells in Table 1, exlcuding one value of 50,000, which seems to be an outlier.
	mean	14588
Tetrahymena thermophila		10483		Jauker et al. (1986, Exp. Cell Res. 166:161)	From dimensions of a prolate spheroid given in discussion (with corrected units).
		15000		Seyfert et al. (1984, J. Cell Sci. 67:203)	Abstract
	mean	12741.5
Plants:
Chlamydomonas reinhardtii		178		Umen and Goodenough (2001, Genes Devel. 15:1652)	Figure 3 legend.
		114		Garz et al. (2012, Biophys. J. 103:1078)	Page 1082.
		140		Craigie and Cavalier-Smith (1982, J. Cell Sci. 54:173)	Summary.
		122		Lien and Knutsen (1979, J. Phycol. 15:191)	Page 192.
	mean	138.5
Ostreococcus tauri		0.91		Henderson et al. (2007, PLOS ONE. 2:e749)	Page E749.
Adonis aestivalis		2380.3		Lin and Gifford (1976, Can. J. Bot. 54:2478)	Vegetative average, Table 2.
		2287		Lin and Gifford (1976, Can. J. Bot. 54:2478)	Transitional average, Table 2.
		2690		Lin and Gifford (1976, Can. J. Bot. 54:2478)	Floral apex average, Table 2.
	mean	2452.43
Glycine max SB-1 cell				No cell volume data available.
Rhus toxicodendron		1222		Vassilyev (2000, Internat. J. Plant Sci. 161:615)	Average of three stages in Table 2.
Zea mays root cell		240000		Hsiao (1970, Plant Physiol. 46:281)	Average of two classes of the nonapical cells in Table 1.
Mammals:
Hamster, intestinal enterocyte		1890		Buschmann and Manke (1981, J. Ultrastruct. Res. 15:26)	Abstract.
HeLa cell		2600		Zhao et al. (2008, NMR Biomed. 21:159)	Discussion.
		3000		Milo (2013, BioEssays 35:1050)	Figure 1
	mean	2800
Mouse pancreas		1434		Dean (1973, Diabetologia, 9:115)	Table 2.
Rat liver cell		4940		Weibel et al. (1969, J. Cell Biol. 42:68)	Page 79.
Notes:	Formula for the volume of a rod = (pi * w^2 / 4) ([h - (w/3)], where h = tip-to-tip length, and w = width; equal to the sum of a cylinder (reduced by a width) and a sphere (two hemispheres).

## Sheet: Ribosome Numbers
Data underlying the ribosome number data on the sheet "Figure 2-source data"
		direct	proteomic
Bacteria:
Bacillus subtilis		6000			Barrera and Pan (2004, RNA. 10:482)		Text page 485.
Escherichia coli		72000			Bremer and Dennis (see reference list in Lynch and Marinov for full details of this reference)		Table 3.		Growth rates per hour (2.5, 2.0, 1.5, 1.0, 0.6)
		45100			Fegatella et al. (1998, Appl. Environ. Microbiol.)
		26300			Fegatella et al. (1998, Appl. Environ. Microbiol.)
		13500			Fegatella et al. (1998, Appl. Environ. Microbiol.)
		6800			Fegatella et al. (1998, Appl. Environ. Microbiol.)
		55000			Bakshi et al. (2012, Mol. Microbiol. 85:21)		Abstract; moderate growth conditions.
		20100			Nilsson et al. (1997, Biotech. Bioeng. 54:461)		Table 3; plasmid-free strain.
		12000			Arfvidsson and Wahlund (2003, Anal. Biochem. 313:76)		Approximate average from Figure 5.
			6514		Wizniewski et al. (2014, Molec. And Cell.Proteomics 13:3497 )		From second supplmentary file; average over 54 monitored ribosomal proteins.
			17979		Lu et al. (2007, Nature Biotech. 25:117)		Supplementary data 2; average over 45 small and large subunit proteins, APEX values.
	mean	27529
Legionella pneumophila		7400			Leskela et al. (2005, J. Microbiol. Methods 62:167)		Page 174.
Leptospira interrogans		4500			Beck et al. (2009, Nature Methods 6:817)		Table 1
			3745		Schmidt et al. (2011, Mol. Syst. Biol. 7:510)		Average of two ribosomal proteins, Table SI.
	mean	4122
Mycoplasma pneumonii		140			Yus et al. (2009, Science 326:1263)		Page 14, Supplemental Material.
		300			Seybert et al. (2006, J. Struc. Biol. 156:342)		Page 352.
		140			Kuhner et al. (2009, Science 326:1235)		Figure S9 indicates 422 for one subunit, whereas text suggests 140 ribosomes/cell.
			255		Maier et al. (2011, Mol. Syst. Biol. 7:511)		Supplemental Table S7, average over all proteins.
	mean	209
Mycobacterium tuberculosis		1672			Yamada et al. (2015, Plos One, 10:e0117109)		Abstract
Rickettsia prowazekii		1500			Pang and Winkler (1994, Mol. Microbiol. 12:115)		Abstract
Sphingopyxis alaskensis		1850			Fegatella et al. (1998, Appl. Environ. Microbiol. 64:4433)		Average of two highest points, Figure 2; midlog phase.
		200			Fegatella et al. (1998, Appl. Environ. Microbiol. 64:4433)		Table 3; stationary growth.
	mean	1025
Spiroplasma melliferum		275			Ortiz et al. (2006, J. Struct. Biol. 156:334)		Page 338.
Staphylococcus aureus		54400			Martin and Iandolo (1975, J. Bacteriol. 122:1136)		Average of two values on page 1138.
Vibrio angustum		27500			Flardh et al. (1992, J. Bacteriol. 174:6780)		Page 6783, three growth rates.
		16000			Flardh et al. (1992, J. Bacteriol. 174:6780)
		8000			Flardh et al. (1992, J. Bacteriol. 174:6780)
Archaea:
ARMAN		92			Comolli et al. (2009, ISME J. 3:159)		Abstract.
Unicellular eukaryotes:
Exophiala dermatitidis		195000			Biswas et al. (2003, J. Elect. Microsc. 52:133)		Table 1.
Saccharomyces cerevisiae		200000			Warner (1999. Trends Biochem. 24:437)		Page 437.
		220000			Yamaguchi et al. (2011, J. Electron Microscop. 60:321)		Abstract.
			134438		Kulak et al. (2014, Nature Methods 11:319)		Supplementary Table 1, average for 98 ribosomal proteins excluding 10 very low outliers.
			74800		Ghaemmaghami et al. (2003, Nature 425:737)
	mean	157310
Schizosaccharomyces pombe		150000			Marguerat et al. (2012, Cell 151:671)		Page 667.
		500000			Maclean (1965, Nature 207:322)		Page 323.
			356180		Kulak et al. (2014, Nature Methods 11:319)		Supplementary Table 1, average for 105 ribosomal proteins excluding 9 very low outliers.
			101099		Marguerat et al. (2012, Cell 151:671)		Table S4, average over 106 ribosomal proteins excluding 4 low outliers; calculation is for actively proliferating cells.
	mean	276820
Tetrahymena pyriformis		88900000			Hallberg and Bruns (1976, J. Cell Biol. 71:383)		Previous reported value was in error, having misread the units. Ribosome equivalents in Table 1 over log and stationary growth averages 6.42 OD units / 10^6 cells. From Calzone et al. (1983), 7.8 units/10^6 cells is equivalent to 10.8 x 10^7 ribosomes per cell, and this was used for linear extrapolation.
Tetrahymena thermophila		74000000			Calzone et al. (1983, J. Biol. Chem. 258:6887)		Table III, average for log and stationary phase.
Plants:
Chlamydomonas reinhardtii		120500			Bourque et al. (1971, J. Cell Biol. 8:153)		Table 2, average of wild-type heterotrophic and mixotrophic.
Ostreococcus tauri		1250			Henderson et al. (2007, PLOS ONE. 2:e749)		Page e749.
Adonis aestivalis		47700000			Lin and Gifford (1976, Can. J. Bot. 54:2478)		Table 3, averages for vegetative, transitional, and floral cells.
		39066666
		23933333
	mean	36900000
Glycine max SB-1 cell		9373333			Jackson and Lark (1982, Plant Physiol. 69:234)		Table 1; average of 3 values for rapidly growing cells.
Rhus toxicodendron		2400000			Vassilyev (2000, Internat. J. Plant Sci. 161:615)		Table 4; sum of free and bound, averaged over two cell types.
Zea mays root cell		25500000			Hsiao (1970, Plant Physiol. 46:281)		Average of two classes of the nonapical cells in Table 1.
Mammals:
Hamster, intestinal enterocyte		1500000			Buschmann and Manke (1981, J. Ultrastruct. Res. 15:26)		Figure 5.
HeLa cell		3150000			Duncan and Hershey (1983, J. Bio. Chem. 258:7228)		Page 7229, average of two values.
			4631143		Kulak et al. (2014, Nature Methods 11:319)		Supplementary Table 1, average for 76 ribosomal proteins excluding 2 very low outliers.
	mean	3.89057e+06
Mouse pancreas		1340000			Dean (1973, Diabetologia, 9:115)		Page 117.
Rat liver cell		12700000			Weibel et al. (1969, J. Cell Biol. 42:68)		Page 83.
